# Supplementary material for: Complex oiling-out behavior of procaine with stable and metastable liquid phases
Source: Royal Society of Chemistry journal article supplement (doi:10.1039/d3cp04622b), 2023-12-05
Supplement: d3cp04622b1.pdf [file d3cp04622b1.pdf]

## Complex oiling-out behavior of procaine with stable and metastable liquid phases

### SUPPLEMENTAL INFORMATION

Da Hye Yang<sup>1</sup> Francesco Ricci<sup>2</sup>, Fredrik L. Nordstrom<sup>2</sup>, Na Li<sup>1,3\*</sup>

#### Predictions based on gPROMS SAFT- $\gamma$ -Mie database parameters

##### I. Model Regression

The smiles string for procaine is CCN(CC)CCOC(=O)c1ccc(cc1)N.

The measured crystalline solubility data of procaine in pure solvents is provided in Figure 1 below.

Table S1: Solubility data used in model regression

| Solvent   | Temperature | Experimental    |
|-----------|-------------|-----------------|
|           | K           | g/100g solution |
| ethanol   | 277.15      | 60.9341         |
| ethanol   | 283.15      | 65.9765         |
| ethanol   | 298.15      | 85.3618         |
| n-heptane | 277.15      | 0.0854          |
| n-heptane | 283.15      | 0.1452          |
| n-heptane | 298.15      | 0.4592          |
| n-heptane | 310.15      | 1.0938          |
| n-heptane | 323.15      | 2.1699          |
| water     | 277.15      | 0.244755146     |
| water     | 283.15      | 0.350518446     |
| water     | 298.15      | 0.942607692     |
| water     | 310.15      | 2.869227165     |
| water     | 323.15      | 7.557664293     |

##### I.1 Database Model

The predicted solubility data using the database model, as well as the associated deviation analysis is shown below.

Table S2: Database model predictions

| Solvent   | Temperature | Solubility      |                 |           | Solute - Solvent interaction coverage | Use data point for estimation       |
|-----------|-------------|-----------------|-----------------|-----------|---------------------------------------|-------------------------------------|
|           |             | Experimental    | Predicted       | Deviation |                                       |                                     |
|           |             | g/100g solution | g/100g solution | %         |                                       |                                     |
| ethanol   | 277.15      | 60.9341         | 32.77           | 46.21%    | 86%                                   | <input checked="" type="checkbox"/> |
| ethanol   | 283.15      | 65.9765         | 52.14           | 20.98%    | 86%                                   | <input checked="" type="checkbox"/> |
| ethanol   | 298.15      | 85.3618         | 76.35           | 10.56%    | 86%                                   | <input checked="" type="checkbox"/> |
| n-heptane | 277.15      | 0.0854          | 4.50E-03        | 94.73%    | 88%                                   | <input checked="" type="checkbox"/> |
| n-heptane | 283.15      | 0.1452          | 8.01E-03        | 94.48%    | 88%                                   | <input checked="" type="checkbox"/> |
| n-heptane | 298.15      | 0.4592          | 3.06E-02        | 93.34%    | 88%                                   | <input checked="" type="checkbox"/> |
| n-heptane | 310.15      | 1.0938          | 8.14E-02        | 92.56%    | 88%                                   | <input checked="" type="checkbox"/> |
| n-heptane | 323.15      | 2.1699          | 0.22            | 89.94%    | 88%                                   | <input checked="" type="checkbox"/> |
| water     | 277.15      | 0.244755146     | 0.31            | 25.48%    | 86%                                   | <input checked="" type="checkbox"/> |
| water     | 283.15      | 0.350518446     | 0.33            | 5.72%     | 86%                                   | <input checked="" type="checkbox"/> |
| water     | 298.15      | 0.942607692     | 0.41            | 56.39%    | 86%                                   | <input checked="" type="checkbox"/> |
| water     | 310.15      | 2.869227165     | 0.50            | 82.43%    | 86%                                   | <input checked="" type="checkbox"/> |
| water     | 323.15      | 7.557664293     | 0.65            | 91.44%    | 86%                                   | <input checked="" type="checkbox"/> |

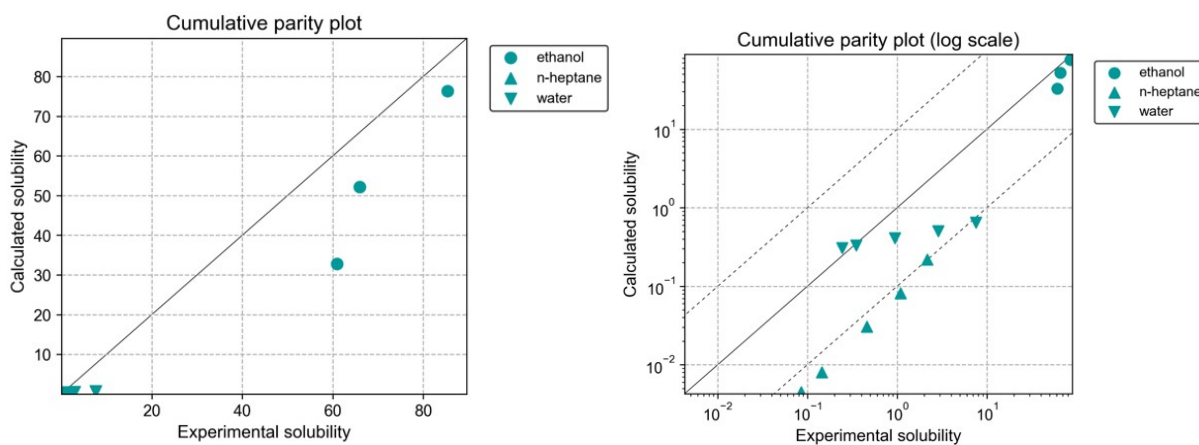

Figure S1: Parity plots for database model predictions.

## I.2 Molecular Model

The predicted solubility data using the molecular model, as well as the associated deviation analysis is shown below.

Note, for the majority of the modelling work performed in this study used a beta version of the gPROMS Solvent Selection (gSS) tool (v 1.0.0-beta 4). After extensive testing by the one of the authors (FR), some unphysical behavior was predicted for procaine (e.g., unphysical melting

temperatures). The software developers (formerly Process Systems Enterprise, and now Siemens) noted that this was due to the fact that the gSS regression algorithm purposefully neglected the presence of the vapor-phase root generated by the equation of state. Hence, the Siemens subject matter expert fit the experimental data for this study in-house, using an amended algorithm which did not neglect the vapor-phase root, thereby leading to an improved parameter search, and the corrected molecular model was sent to the author for subsequent prediction. The regressed parameters are provided in Figure S3 below.

Table S3: Molecular model predictions

| SOLVENT   | T [K]  | Csat (exp)<br>[wt%] | Csat (pred)<br>[wt%] | %Deviation  |
|-----------|--------|---------------------|----------------------|-------------|
| ethanol   | 277.15 | 60.9341             | 62.35673386          | 2.334708904 |
| ethanol   | 283.15 | 65.9765             | 67.22187727          | 1.887607355 |
| ethanol   | 298.15 | 85.3618             | 80.41127709          | 5.799459366 |
| n-heptane | 277.15 | 0.0854              | 0.089217128          | 4.469705213 |
| n-heptane | 283.15 | 0.1452              | 0.145716784          | 0.355911696 |
| n-heptane | 298.15 | 0.4592              | 0.449919467          | 2.021022018 |
| n-heptane | 310.15 | 1.0938              | 1.010221999          | 7.641067965 |
| n-heptane | 323.15 | 2.1699              | 2.236176405          | 3.054352983 |
| water     | 277.15 | 0.244755146         | 0.19711273           | 19.46533786 |
| water     | 283.15 | 0.350518446         | 0.33953004           | 3.134901144 |
| water     | 298.15 | 0.942607692         | 1.178694883          | 25.046177   |
| water     | 310.15 | 2.869227165         | 2.855157215          | 0.490374214 |
| water     | 323.15 | 7.557664293         | 6.706214835          | 11.26603967 |
|           |        |                     | AVG DEV =            | 6.689743492 |
|           |        |                     | MEDIAN DEV =         | 3.134901144 |

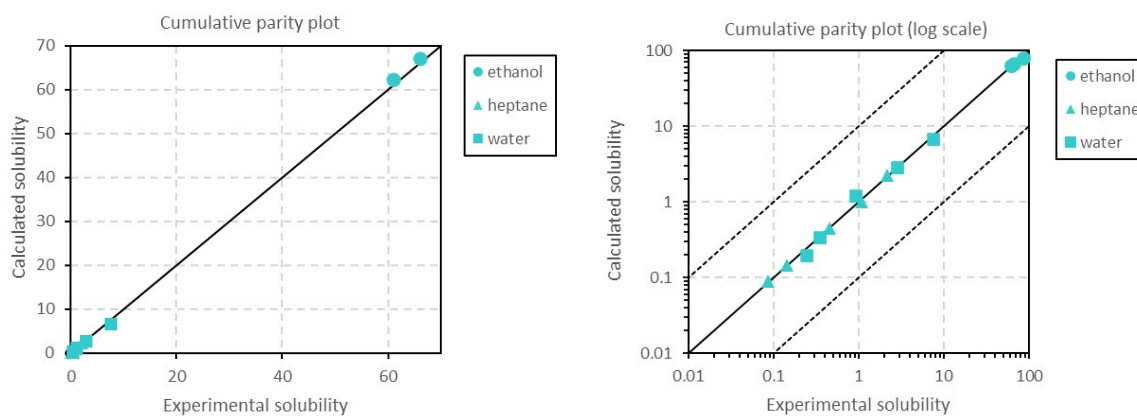

Figure S2: Parity plots for molecular model predictions.

```

<databank>
  <compound>
    <ref>Procaine</ref>
    <groupComposition>
      <functionalGroup>
        <ref>Procaine_X</ref>
        <multiplicity>1</multiplicity>
      </functionalGroup>
    </groupComposition>
  </compound>
  <functionalGroup>
    <name>Procaine_X</name>
    <site>
      <name>H</name>
      <multiplicity>2</multiplicity>
      <associationContribution>
        <variant>acceptor</variant>
      </associationContribution>
    </site>
    <site>
      <name>e</name>
      <multiplicity>2</multiplicity>
      <associationContribution>
        <variant>donor</variant>
      </associationContribution>
    </site>
    <numberOfSegments>1</numberOfSegments>
    <shapeFactor>1.0274076428126608</shapeFactor>
    <lambdaRepulsive>12.0</lambdaRepulsive>
    <lambdaAttractive>6</lambdaAttractive>
    <sigma>2.0609178567070572e-10</sigma>
    <epsilon>857.5950810003238</epsilon>
    <charge>0</charge>
  </functionalGroup>
  <functionalGroupPair ref1="Procaine_X" ref2="CH2">
    <epsilon>762.4263997845037</epsilon>
  </functionalGroupPair>
  <functionalGroupPair ref1="Procaine_X" ref2="CH3">
    <epsilon>994.573324582912</epsilon>
  </functionalGroupPair>
  <functionalGroupPair ref1="Procaine_X" ref2="H2O">
    <epsilon>622.19436016055</epsilon>
    <bondingVolume elementSet="site" ref1="H" ref2="e">4.287579340149681e-28</bondingVolume>
    <epsilonAssoc elementSet="site" ref1="H" ref2="e">691.8939144811493</epsilonAssoc>
    <bondingVolume elementSet="site" ref1="e" ref2="H">4.287579340149681e-28</bondingVolume>
    <epsilonAssoc elementSet="site" ref1="e" ref2="H">691.8939144811493</epsilonAssoc>
  </functionalGroupPair>
  <functionalGroupPair ref1="Procaine_X" ref2="OH_Short">
    <epsilon>802.2180379066966</epsilon>
    <bondingVolume elementSet="site" ref1="H" ref2="e">8.436974649801043e-30</bondingVolume>
    <epsilonAssoc elementSet="site" ref1="H" ref2="e">2147.656497742364</epsilonAssoc>
    <bondingVolume elementSet="site" ref1="e" ref2="H">8.436974649801043e-30</bondingVolume>
    <epsilonAssoc elementSet="site" ref1="e" ref2="H">2147.656497742364</epsilonAssoc>
  </functionalGroupPair>
  <functionalGroupPair ref1="Procaine_X" ref2="Procaine_X">
    <bondingVolume elementSet="site" ref1="H" ref2="e">1.68927579577596e-30</bondingVolume>
    <epsilonAssoc elementSet="site" ref1="H" ref2="e">1657.4218661676125</epsilonAssoc>
  </functionalGroupPair>
</databank>

```

Figure S3: Molecular model regressed parameter values, as reported in gSS .xml file.

## II. Experimental phase boundary data

### II.1 Crystalline solubility

#### i. Neat heptane

| Temperature (°C) | Solubility (API<br>mg/g solvent) | Wt.%    |            |                 |
|------------------|----------------------------------|---------|------------|-----------------|
|                  |                                  | Ethanol | Heptane    | Procaine        |
| 4                | 0.8546±0.3231                    | 0       | 99.91±0.03 | 0.08538±0.03226 |
| 10               | 1.454±0.062                      | 0       | 99.85±0.01 | 0.1452±0.0061   |
| RT               | 4.613±0.068                      | 0       | 99.54±0.01 | 0.4592±0.0068   |
| 37               | 11.06±0.25                       | 0       | 98.91±0.02 | 1.094±0.024     |
| 50               | 22.19±4.12                       | 0       | 97.83±0.40 | 2.170±0.395     |

#### ii. Neat ethanol

| Temperature (°C) | Solubility (API<br>mg/g solvent) | Wt.%       |         |            |
|------------------|----------------------------------|------------|---------|------------|
|                  |                                  | Ethanol    | Heptane | Procaine   |
| 4                | 1560±4                           | 39.07±0.06 | 0       | 60.93±0.06 |
| 10               | 1940±41                          | 34.02±0.48 | 0       | 65.98±0.48 |
| RT               | 5837±230                         | 14.64±0.48 | 0       | 85.36±0.48 |

#### iii. 0.6 v/v ethanol in heptane

| Temperature (°C) | Solubility (API<br>mg/g solvent) | Wt.%        |             |            |
|------------------|----------------------------------|-------------|-------------|------------|
|                  |                                  | Ethanol     | Heptane     | Procaine   |
| 4                | 492.9±26.3                       | 42.80±0.75  | 24.20±0.42  | 33.00±1.17 |
| 10               | 700.4±31.3                       | 37.58±0.70  | 21.25±0.39  | 41.18±1.09 |
| RT               | 1814±295                         | 22.86±2.29  | 12.92±1.30  | 64.22±3.59 |
| 37               | 11319±4733                       | 5.666±1.901 | 3.204±1.075 | 91.13±2.98 |

#### iv. 0.8 v/v ethanol in heptane

| Temperature (°C) | Solubility (API<br>mg/g solvent) | Wt.%        |             |            |
|------------------|----------------------------------|-------------|-------------|------------|
|                  |                                  | Ethanol     | Heptane     | Procaine   |
| 4                | 968.3±41.2                       | 41.93±0.89  | 8.890±0.188 | 49.18±1.08 |
| 10               | 1239±19                          | 36.85±0.31  | 7.812±0.067 | 55.34±0.38 |
| RT               | 3680±258                         | 17.66±0.95  | 3.745±0.202 | 78.59±1.15 |
| 37               | 13151±4816                       | 6.311±2.157 | 1.338±0.457 | 92.35±2.61 |

### II.2 Oiling out limits

#### i. Antisolvent titration

| Temperature (°C) | Solubility (API<br>mg/g solvent) | Wt.%    |         |          |
|------------------|----------------------------------|---------|---------|----------|
|                  |                                  | Ethanol | Heptane | Procaine |
| 4                | 106.4                            | 37.85   | 52.54   | 9.617    |

|    |       |        |       |        |
|----|-------|--------|-------|--------|
|    | 98.40 | 36.54  | 54.50 | 8.958  |
|    | 86.44 | 34.75  | 57.29 | 7.956  |
|    | 76.35 | 33.02  | 59.88 | 7.093  |
|    | 67.22 | 31.14  | 62.56 | 6.299  |
|    | 63.43 | 30.35  | 63.69 | 5.965  |
|    | 57.00 | 28.99  | 65.62 | 5.393  |
|    | 51.76 | 27.87  | 67.21 | 4.921  |
|    | 46.85 | 26.63  | 68.89 | 4.475  |
|    | 37.16 | 23.90  | 72.51 | 3.583  |
|    | 30.11 | 21.60  | 75.47 | 2.923  |
|    | 24.49 | 19.39  | 78.22 | 2.391  |
|    | 14.37 | 13.53  | 85.05 | 1.417  |
|    | 13.16 | 14.28  | 84.42 | 1.299  |
|    | 12.06 | 14.82  | 83.99 | 1.192  |
|    | 6.385 | 1.279  | 98.09 | 0.6344 |
|    | 6.385 | 1.279  | 98.09 | 0.6344 |
|    | 6.320 | 0.8688 | 98.50 | 0.6280 |
|    | 12.45 | 7.532  | 91.24 | 1.230  |
|    | 9.388 | 6.279  | 92.79 | 0.9301 |
|    | 239.8 | 44.56  | 36.10 | 19.34  |
|    | 183.2 | 44.05  | 40.46 | 15.48  |
|    | 160.0 | 43.72  | 42.48 | 13.79  |
|    | 142.0 | 43.46  | 44.11 | 12.43  |
|    | 110.0 | 41.07  | 49.02 | 9.909  |
|    | 97.12 | 39.09  | 52.06 | 8.853  |
|    | 152.2 | 40.56  | 46.23 | 13.21  |
| 10 | 113.4 | 27.87  | 61.94 | 10.18  |
|    | 181.0 | 38.08  | 46.60 | 15.32  |
|    | 294.9 | 39.11  | 38.11 | 22.78  |
|    | 253.7 | 38.84  | 40.92 | 20.24  |
|    | 71.08 | 16.91  | 76.45 | 6.636  |
|    | 158.9 | 35.00  | 51.30 | 13.71  |
|    | 14.25 | 2.832  | 95.76 | 1.404  |
|    | 18.78 | 2.550  | 95.61 | 1.843  |
| RT | 23.66 | 7.835  | 89.85 | 2.312  |
|    | 114.9 | 24.58  | 65.12 | 10.30  |
|    | 16.59 | 6.513  | 91.86 | 1.632  |
|    | 22.05 | 6.755  | 91.09 | 2.158  |
|    | 101.1 | 24.35  | 66.47 | 9.178  |
|    | 93.07 | 24.22  | 67.27 | 8.514  |
|    | 332.1 | 34.17  | 40.90 | 24.93  |
|    | 290.0 | 32.95  | 44.57 | 22.48  |
|    | 316.9 | 35.25  | 40.69 | 24.06  |
|    | 403.6 | 36.07  | 35.17 | 28.76  |
|    | 123.4 | 25.33  | 63.68 | 10.98  |
|    | 257.8 | 34.95  | 44.56 | 20.49  |

|    |       |       |       |       |
|----|-------|-------|-------|-------|
|    | 115.8 | 25.18 | 64.45 | 10.37 |
|    | 87.07 | 22.33 | 69.66 | 8.010 |
|    | 67.59 | 19.93 | 73.74 | 6.331 |
|    | 51.68 | 17.24 | 77.84 | 4.914 |
|    | 34.98 | 13.69 | 82.93 | 3.380 |
|    | 31.37 | 12.87 | 84.09 | 3.042 |
|    | 23.84 | 10.90 | 86.77 | 2.328 |
|    | 122.5 | 29.77 | 59.32 | 10.91 |
|    | 463.6 | 38.99 | 29.33 | 31.67 |
|    | 352.1 | 39.36 | 34.60 | 26.04 |
|    | 291.5 | 38.35 | 39.08 | 22.57 |
|    | 254.7 | 36.38 | 43.32 | 20.30 |
|    | 226.1 | 34.78 | 46.78 | 18.44 |
|    | 203.3 | 33.44 | 49.66 | 16.90 |
|    | 186.3 | 31.82 | 52.48 | 15.70 |
|    | 170.5 | 30.88 | 54.55 | 14.57 |
|    | 158.4 | 29.62 | 56.71 | 13.67 |
|    | 147.9 | 28.51 | 58.61 | 12.88 |
|    | 138.7 | 27.52 | 60.30 | 12.18 |
|    | 122.6 | 26.21 | 62.87 | 10.92 |
|    | 25.30 | 3.413 | 94.12 | 2.467 |
|    | 28.21 | 5.533 | 91.72 | 2.744 |
| 37 | 179.6 | 25.58 | 59.19 | 15.23 |
|    | 25.16 | 6.896 | 90.65 | 2.455 |
|    | 33.40 | 7.255 | 89.51 | 3.232 |
|    | 28.70 | 7.051 | 90.16 | 2.790 |
|    | 179.6 | 25.58 | 59.19 | 15.23 |
|    | 128.1 | 19.12 | 69.53 | 11.35 |
|    | 84.61 | 11.35 | 80.85 | 7.801 |
|    | 342.9 | 31.79 | 42.68 | 25.53 |
|    | 67.68 | 15.04 | 78.62 | 6.339 |
|    | 64.05 | 14.56 | 79.42 | 6.019 |
|    | 61.52 | 14.29 | 79.92 | 5.796 |
|    | 44.82 | 11.72 | 83.99 | 4.289 |
|    | 298.3 | 25.93 | 51.09 | 22.98 |
|    | 275.9 | 26.05 | 52.33 | 21.62 |
|    | 244.3 | 25.14 | 55.22 | 19.64 |
|    | 216.1 | 24.11 | 58.12 | 17.77 |
|    | 193.8 | 23.25 | 60.51 | 16.23 |
|    | 173.6 | 22.32 | 62.89 | 14.79 |
|    | 154.1 | 21.16 | 65.49 | 13.35 |
|    | 138.5 | 20.20 | 67.63 | 12.17 |
|    | 124.8 | 19.26 | 69.64 | 11.09 |
|    | 113.5 | 18.48 | 71.33 | 10.19 |
|    | 104.1 | 17.81 | 72.76 | 9.428 |
|    | 85.32 | 16.04 | 76.10 | 7.861 |

|    |       |       |       |       |
|----|-------|-------|-------|-------|
|    | 54.16 | 10.36 | 84.50 | 5.138 |
|    | 37.47 | 7.283 | 89.11 | 3.612 |
|    | 37.86 | 5.047 | 91.30 | 3.648 |
| 55 | 50.84 | 8.001 | 87.16 | 4.838 |
|    | 41.12 | 6.568 | 89.48 | 3.950 |
|    | 47.46 | 6.518 | 88.95 | 4.531 |
|    | 146.9 | 21.81 | 65.37 | 12.81 |
|    | 108.7 | 21.98 | 68.21 | 9.802 |
|    | 138.6 | 22.53 | 65.29 | 12.17 |
|    | 110.2 | 20.01 | 70.06 | 9.929 |
|    | 84.24 | 16.93 | 75.30 | 7.770 |
|    | 67.74 | 14.87 | 78.79 | 6.344 |
|    | 47.84 | 11.45 | 83.98 | 4.566 |
|    | 164.5 | 15.18 | 70.69 | 14.13 |
|    | 75.57 | 10.08 | 82.90 | 7.026 |
|    | 63.99 | 7.501 | 86.49 | 6.014 |
|    | 465.5 | 25.33 | 42.90 | 31.76 |
|    | 435.1 | 25.62 | 44.06 | 30.32 |
|    | 408.5 | 25.89 | 45.11 | 29.00 |
|    | 373.1 | 25.55 | 47.27 | 27.17 |
|    | 343.4 | 25.26 | 49.18 | 25.56 |
|    | 310.0 | 24.51 | 51.82 | 23.67 |
|    | 284.2 | 23.97 | 53.90 | 22.13 |
|    | 251.1 | 23.65 | 56.27 | 20.07 |
|    | 223.0 | 22.80 | 58.97 | 18.24 |
|    | 195.8 | 21.64 | 61.99 | 16.37 |

## ii. Cooling experiments

| Temperature (°C) | Solubility (API<br>mg/g solvent) | Wt. %   |         |          |
|------------------|----------------------------------|---------|---------|----------|
|                  |                                  | Ethanol | Heptane | Procaine |
| RT               | 11.75                            | 0       | 98.84   | 1.162    |
|                  | 12.94                            | 0       | 98.72   | 1.278    |
|                  | 9.873                            | 0       | 99.02   | 0.978    |
| 37               | 16.20                            | 0       | 98.41   | 1.594    |
|                  | 16.02                            | 0       | 98.42   | 1.577    |
|                  | 16.88                            | 0       | 98.34   | 1.660    |
| 50               | 29.30                            | 0       | 97.15   | 2.847    |
|                  | 26.75                            | 0       | 97.39   | 2.605    |
|                  | 29.87                            | 0       | 97.10   | 2.900    |
| 55               | 33.32                            | 0       | 96.78   | 3.224    |
|                  | 33.09                            | 0       | 96.80   | 3.203    |
|                  | 34.16                            | 0       | 96.70   | 3.303    |
| 60               | 37.78                            | 0       | 96.36   | 3.641    |
|                  | 38.08                            | 0       | 96.33   | 3.668    |
|                  | 38.62                            | 0       | 96.28   | 3.718    |
| 65               | 38.66                            | 0       | 96.28   | 3.722    |



|       |   |       |       |
|-------|---|-------|-------|
| 38.89 | 0 | 96.26 | 3.743 |
| 38.28 | 0 | 96.31 | 3.687 |

### iii. Heating experiments

| Temperature<br>(°C) | Phases   | Solubility (API<br>mg/g solvent) | Wt.%    |         |          |
|---------------------|----------|----------------------------------|---------|---------|----------|
|                     |          |                                  | Ethanol | Heptane | Procaine |
| 55                  | Heptane  | 26.87                            | 0       | 97.38   | 2.617    |
|                     |          | 22.29                            | 0       | 97.82   | 2.180    |
|                     |          | 23.97                            | 0       | 97.66   | 2.341    |
|                     |          | 22.58                            | 0       | 97.79   | 2.208    |
|                     | Procaine | 14493                            | 0       | 6.454   | 93.55    |
|                     |          | 13317                            | 0       | 6.985   | 93.02    |
|                     |          | 11988                            | 0       | 7.700   | 92.30    |
|                     |          | 14532                            | 0       | 6.438   | 93.56    |
| 60                  | Heptane  | 34.66                            | 0       | 96.65   | 3.350    |
|                     |          | 35.75                            | 0       | 96.55   | 3.451    |
|                     |          | 40.24                            | 0       | 96.13   | 3.869    |
|                     |          | 43.73                            | 0       | 95.81   | 4.190    |
|                     | Procaine | 10330                            | 0       | 8.826   | 91.17    |
|                     |          | 11457                            | 0       | 8.028   | 91.97    |
|                     |          | 12256                            | 0       | 7.544   | 92.46    |
|                     |          | 5667                             | 0       | 15.00   | 85.00    |
| 70                  | Heptane  | 52.15                            | 0       | 95.04   | 4.956    |
|                     |          | 63.07                            | 0       | 94.07   | 5.933    |
|                     |          | 51.61                            | 0       | 95.09   | 4.908    |
|                     |          | 53.76                            |         | 94.90   | 5.102    |
|                     | Procaine | 7000                             | 0       | 12.50   | 87.50    |
|                     |          | 7305                             | 0       | 12.04   | 87.96    |
|                     |          | 8024                             | 0       | 11.08   | 88.92    |
|                     |          | 6970                             | 0       | 12.55   | 87.45    |
| 85                  | Heptane  | 85.56                            | 0       | 92.12   | 7.882    |
|                     |          | 84.95                            | 0       | 92.17   | 7.830    |
|                     |          | 85.84                            | 0       | 92.09   | 7.905    |
|                     | Procaine | 6219                             | 0       | 13.85   | 86.15    |
|                     |          | 5759                             | 0       | 14.79   | 85.21    |
|                     |          | 6062                             | 0       | 14.16   | 85.84    |
| 95                  | Heptane  | 134.4                            | 0       | 88.15   | 11.85    |
|                     |          | 135.4                            | 0       | 88.07   | 11.93    |
|                     |          | 135.3                            | 0       | 88.08   | 11.92    |
|                     | Procaine | 4455                             | 0       | 18.33   | 81.67    |
|                     |          | 4528                             | 0       | 18.09   | 81.91    |
|                     |          | 4345                             | 0       | 18.71   | 81.29    |
